# Supplementary material for: Two-photon absorption behavior of conjugated oligomers suitable for low colour temperature LEDs
Source: Royal Society of Chemistry journal article supplement (doi:10.1039/d3ra00083d), 2023-01-01
Supplement: d3ra00083d1.pdf [file d3ra00083d1.pdf]

**Electronic Supporting Information for**  
**Two-photon absorption behavior of conjugated oligomers suitable**  
**for low colour temperature LEDs**

Tianhao Huang<sup>a,\*</sup>, Chengzi Jiang<sup>b</sup>, Tianning Xu<sup>a,†</sup>, Jinhui Ying<sup>a</sup>, Ran Lu<sup>c</sup>, Huipeng Zhou<sup>d,‡</sup>

<sup>a</sup> Department of Science, Zhijiang College of Zhejiang University of Technology, Shaoxing  
312030, China

<sup>b</sup> Griffith Business School, Griffith University, Parklands Dr Southport QLD 4215, Australia

<sup>c</sup> College of Chemistry, Jilin University, Changchun 130012, China

<sup>d</sup> Jiangsu Sino-tech Polym. New Materials Industry Technology Research Institute Co., Ltd.,  
Changzhou 213000, China

**Table of Contents**

**S1** <sup>1</sup>H-NMR and elemental analysis data

**Fig. S1** 500MHz <sup>1</sup>H-NMR spectra of compound #1–#4.

**Table S1** Spectral parameters obtained from the absorption spectra, employing multi-peaks Gaussian fit.

**Fig. S2** Normalized absorption and OPF spectra of #1–#4.

**Table S2** Linear optical parameters derived from the normalized absorption and OPF spectra.

---

\* Corresponding author. Tel.: +86 18367168006; E-mail address: hth@zzjc.edu.cn

† Corresponding author. Tel.: +86 13750801472; E-mail address: xutianning@zjut.edu.cn

‡ Corresponding author. E-mail address: zhouhuipeng0318@163.com

---

## S1 <sup>1</sup>H-NMR and elemental analysis data

#1: <sup>1</sup>H-NMR (500 MHz, CDCl<sub>3</sub>) δ 7.82 (s, 2H), 7.51 (d, *J* = 9.3 Hz, 2H), 7.44 (d, *J* = 7.7 Hz, 2H), 7.38 (d, *J* = 8.7 Hz, 4H), 7.30–7.26 (m, 6H), 7.26 (s, 2H), 7.14–7.10 (m, 10H), 7.07–7.02 (m, 8H), 6.97 (d, *J* = 16.2 Hz, 2H). Elemental analysis calculated for C<sub>53</sub>H<sub>38</sub>N<sub>2</sub>O: C, 88.55; H, 5.33; N, 3.90; O, 2.23. Found: C, 88.62; H, 5.26; N, 3.86. MS, *m/z*: cal: 718.9, found: 718.9.

#2: <sup>1</sup>H-NMR (500 MHz, CDCl<sub>3</sub>) δ 7.80–7.70 (m, 2H), 7.48–7.34 (m, 4H), 7.26–7.18 (m, 4H), 7.17–7.10 (m, 4H), 7.03–6.75 (m, 10H), 3.81 (s, 4H), 1.79 (s, 4H), 1.42 (s, 4H), 1.34–1.23 (m, 16H), 0.87 (t, *J* = 6.9 Hz, 6H). Elemental analysis calculated for C<sub>57</sub>H<sub>58</sub>N<sub>2</sub>OS<sub>2</sub>: C, 80.43; H, 6.87; N, 3.29; O, 1.88; S, 7.53. Found: C, 80.36; H, 6.92; N, 6.89. MS, *m/z*: cal: 851.2, found: 851.3.

#3: <sup>1</sup>H-NMR (500 MHz, CDCl<sub>3</sub>) δ 7.93 (s, 2H), 7.69–7.65 (m, 4H), 7.62 (d, *J* = 7.6 Hz, 2H), 7.50 (dd, *J* = 10.3, 7.6 Hz, 8H), 7.47–7.42 (m, 6H), 7.32–7.26 (m, 10H), 7.20–7.03 (m, 22H), 2.09–1.98 (m, 8H), 1.22–1.06 (m, 40H), 0.81 (t, *J* = 7.1 Hz, 12H), 0.70 (s, 8H). Elemental analysis calculated for C<sub>115</sub>H<sub>122</sub>N<sub>2</sub>O: C, 89.21; H, 7.94; N, 1.81; O, 1.03. Found: C, 89.33; H, 7.86; N, 1.76. MS, *m/z*: cal: 1548.2, found: 1548.8.

#4: <sup>1</sup>H-NMR (500 MHz, CDCl<sub>3</sub>) δ 7.92 (s, 2H), 7.68–1.64 (m, 1H), 7.61 (d, *J* = 7.7 Hz, 2H), 7.54–7.39 (m, 11H), 7.35 (s, 2H), 7.31–7.26 (m, 4H), 7.20–6.99 (m, 10H), 6.84 (s, 5H), 3.89 (s, 4H), 2.02 (s, 8H), 1.82 (s, 4H), 1.47–1.41 (m, 4H), 1.32–1.05 (m, 56H), 0.87 (t, *J* = 5.8 Hz, 6H), 0.80 (t, *J* = 7.1 Hz, 12H), 0.69 (s, 6H). Elemental analysis calculated for C<sub>119</sub>H<sub>142</sub>N<sub>2</sub>OS<sub>2</sub>: C, 85.05; H, 8.827; N, 1.67; O, 0.95; S, 3.82. Found: C, 85.12; H, 8.43; N, 1.59. MS, *m/z*: cal: 1680.5, found: 1681.0.

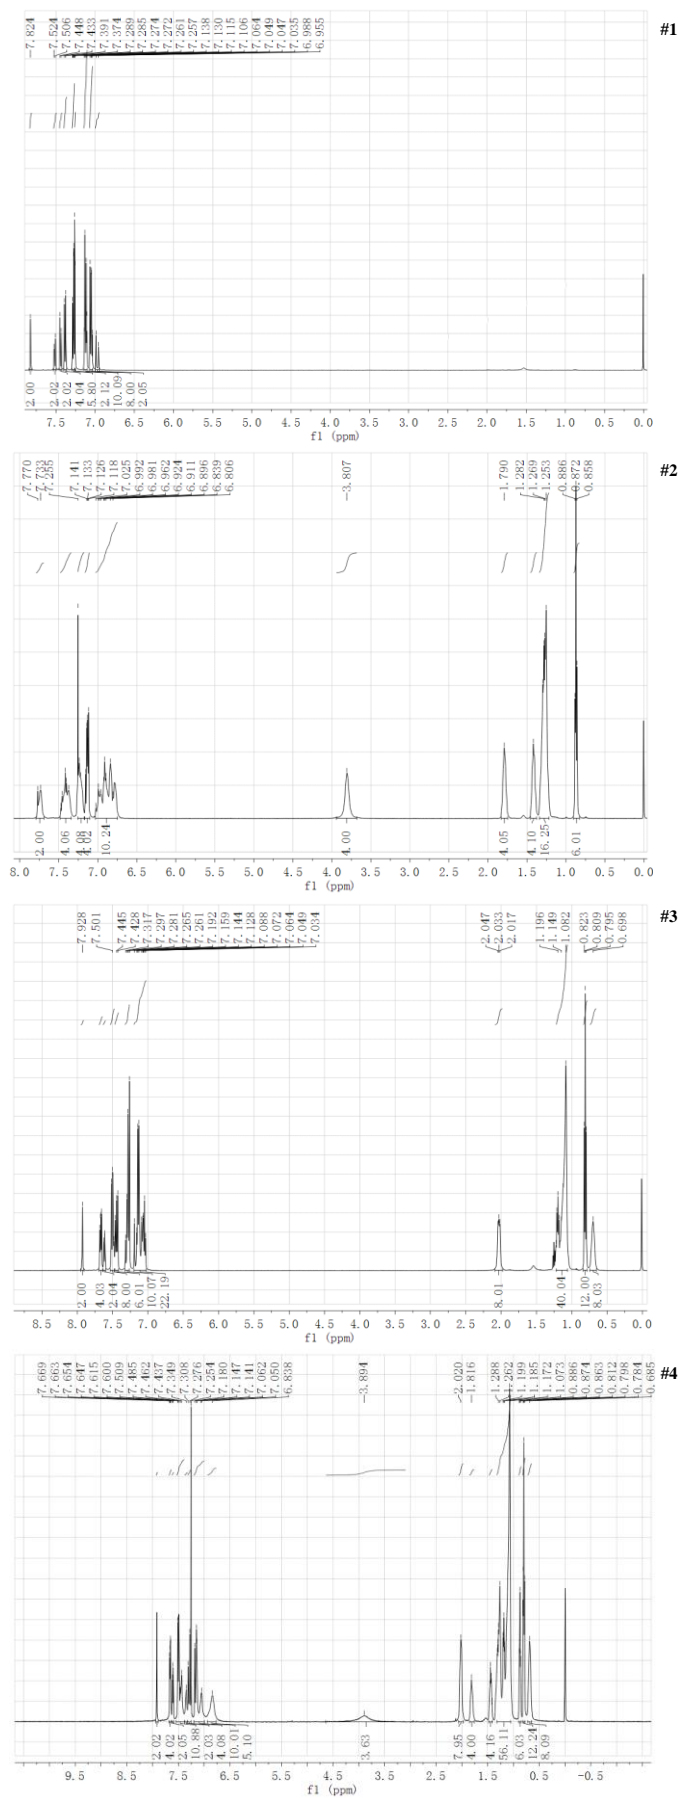

Fig. S1 500MHz  $^1\text{H-NMR}$  spectra of compound #1–#4.

**Table S1** Spectral parameters obtained from the absorption spectra, employing multi-peaks Gaussian fit.

| Samples | Parameters    | Peak assignments |             |      |
|---------|---------------|------------------|-------------|------|
|         |               | $n-\pi^*$        | $\pi-\pi^*$ | ICT  |
| #1      | Center / nm   | 307, 317         | 385, 415    | 487  |
|         | Width / nm    | 13.1, 36.0       | 50.4, 34.1  | 80.9 |
|         | Height / a.u. | 0.08, 0.29       | 0.40, 0.53  | 0.14 |
|         | Area / %      | 18.8             | 62.5        | 18.7 |
| #2      | Center / nm   | 311, 318         | 366, 410    | 484  |
|         | Width / nm    | 15.8, 38.5       | 36.1, 42.8  | 83.5 |
|         | Height / a.u. | 0.16, 0.26       | 0.27, 0.51  | 0.13 |
|         | Area / %      | 22.6             | 57.2        | 20.2 |
| #3      | Center / nm   | 319              | 402, 429    | 489  |
|         | Width / nm    | 41.3             | 63.9, 35.0  | 57.3 |
|         | Height / a.u. | 0.31             | 0.87, 0.52  | 0.19 |
|         | Area / %      | 13.2             | 75.9        | 10.9 |
| #4      | Center / nm   | 325              | 407, 431    | 489  |
|         | Width / nm    | 43.1             | 65.8, 29.2  | 60.3 |
|         | Height / a.u. | 0.30             | 0.95, 0.29  | 0.18 |
|         | Area / %      | 13.9             | 75.0        | 11.1 |

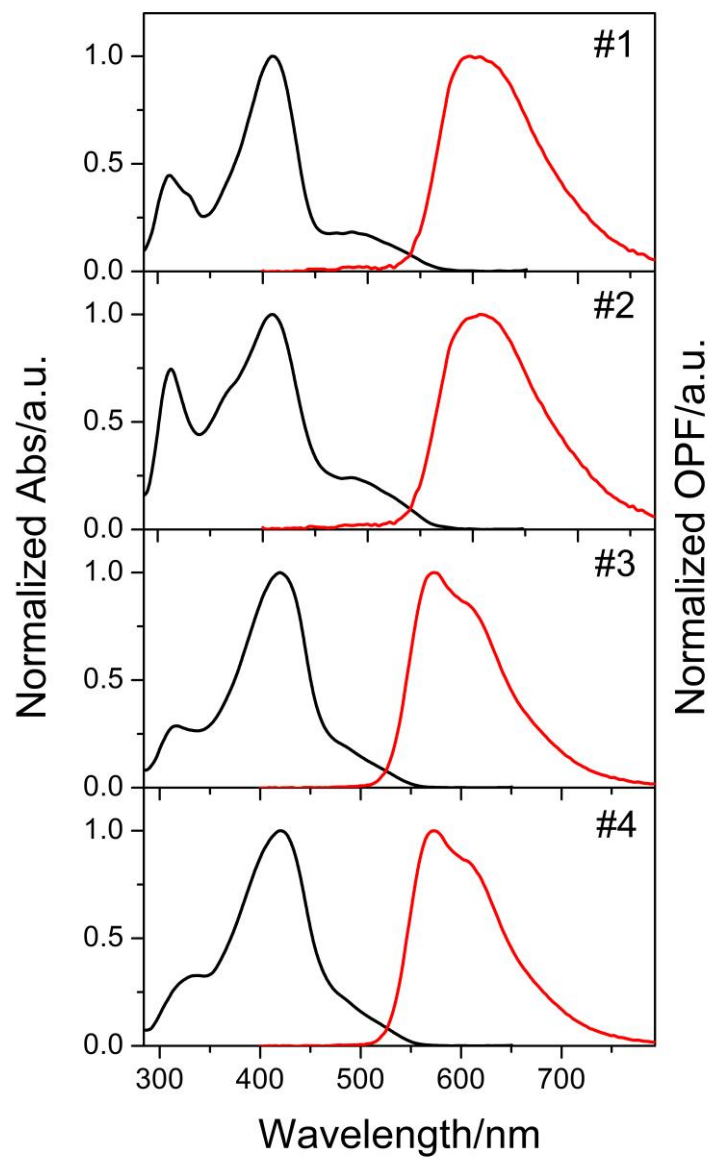

**Fig. S2** Normalized absorption and OPF spectra of #1–#4.

---

**Table S2** Linear optical parameters derived from the normalized absorption and OPF spectra.

| Linear optical parameters              | Samples |      |      |      |
|----------------------------------------|---------|------|------|------|
|                                        | #1      | #2   | #3   | #4   |
| $\lambda_{\max}(\text{Abs})/\text{nm}$ | 409     | 409  | 424  | 423  |
| $\lambda_{\max}(\text{OPF})/\text{nm}$ | 597     | 607  | 573  | 571  |
| OPF intensity/ $10^5$                  | 3.4     | 3.3  | 8.6  | 8.6  |
| $E_g^{\text{opt}}/\text{eV}$           | 2.30    | 2.29 | 2.36 | 2.36 |
| Stokes shift/ $\text{cm}^{-1}$         | 7705    | 7981 | 6137 | 6132 |

---
